# Supplementary material for: Growth and Morbidity of Gambian Infants are Influenced by Maternal Milk Oligosaccharides and Infant Gut Microbiota
Source: Sci Rep. 2017 Jan 12;7:40466. doi: 10.1038/srep40466 (PMC5227965; doi:10.1038/srep40466)

# **Growth and Morbidity of Gambian Infants are Influenced by Maternal Milk Oligosaccharides and Infant Gut Microbiota**

**Authors:** Jasmine C. C. Davis<sup>1,2</sup>, Zachery T. Lewis<sup>2,3</sup>, Sridevi Krishnan<sup>4</sup>, Robin M. Bernstein<sup>6,7</sup>, Sophie E. Moore<sup>8,9</sup>, Andrew M. Prentice<sup>9</sup>, David A. Mills<sup>2,3,5</sup>, Carlito B. Lebrilla<sup>1,2</sup>, and Angela M. Zivkovic<sup>2,4\*</sup>

## **Affiliations:**

<sup>1</sup>Department of Chemistry, <sup>2</sup>Foods for Health Institute, <sup>3</sup>Department of Food Science and Technology, <sup>4</sup>Department of Nutrition, and <sup>5</sup>Department of Viticulture and Enology, University of California, Davis, CA 95616, United States

<sup>6</sup>Department of Anthropology, <sup>7</sup>Health and Society Program, Institute of Behavioral Science, University of Colorado, Boulder, CO 80309, United States

<sup>8</sup>Medical Research Council (MRC) Human Nutrition Research, Cambridge, UK

<sup>9</sup>MRC Unit, The Gambia and MRC International Nutrition Group, London School of Hygiene & Tropical Medicine, London, UK

\*To whom correspondence should be addressed: Angela M. Zivkovic, amzivkovic@ucdavis.edu

## Supplementary Figure Legends

**Supplementary Figure S1.** Differences in individual human milk oligosaccharides (HMOs) between infants who were sick and those who were not sick. Plots are divided by sick (■) vs. not sick (□) infants, displaying average and standard error bars for relative abundances of (A) F-LNO (fucosyllacto-*N*-octaose) at week 4, (B) MFpLNH IV (fucosyl-para-lacto-*N*-hexaose) at week 16, and (C) IFLNH III (isomer III fucosyl-paralacto-*N*-hexaose) at week 16. *P*-value based on Mann-Whitney U tests. HMO structures pictured with monosaccharides Glc (●), Gal (●), GlcNAc (■), and Fuc (▲).

**Supplementary Figure S2.** Relative abundance plots showing the differences in the gut microbiota between infants who were sick and those who were not. The plots show the class-wise distribution of the enriched taxa at the lowest taxonomic level at which they are enriched.

**Supplementary Figure S3.** Box plots displaying change in infant fecal calprotectin levels (mg/kg) at 4, 16, and 20 weeks postpartum. Median is given as a line, 25th and 75th percentiles are the top and bottom of the box, whiskers are data within 1.5\*(75th – 25th percentile) of the median, outliers displayed as dots above the box. *N* at each week given above plot with *P*-value based on linear mixed effects model.

**Supplementary Figure S4.** Relative abundance plots showing the differences in the gut microbiota between infants categorized into having normal, borderline, or abnormal calprotectin levels. The plots show the class-wise distribution of the enriched taxa at the lowest taxonomic level at which they are enriched.

**Supplementary Figure S5.** Cladogram plots of microbiota enriched in infants categorized by (A) WAZ and (B) HAZ scores. Infants with WAZ scores <-2 were assigned as “underweight,”

infants with scores  $>-2$  were “desired weight,” infants with HAZ scores  $<-2$  were assigned as “stunted,” and infants with scores  $>-2$  were “not stunted.” Plots indicate microbes that were enriched in infants who were at desired weight (■) or underweight (■), and not stunted (■) or stunted (■) based on LefSe analysis.

**Supplementary Figure S6.** Cladogram plot of microbiota enriched in infants born in either the dry (■) or wet (■) season.

**Supplementary Figure S7.** Changes in the predicted functional profile of the infant fecal microbiome over time from week 4 (■) to week 16 (■) to week 20 (■). The median of the data is shown as a line, the mean of the data as a star, the 25th and 75th percentiles of the data as the top and bottom of the box, and the most extreme data point within  $1.5 \times (75\text{th} - 25\text{th percentile})$  of the median as whiskers. Data points outside of the whiskers are shown as crosses.

**Supplementary Figure S8.** Associations between growth, morbidity, and a decrease in bifidobacteria abundance for infant 25. From week 16 to week 20, the relative abundance of bifidobacteria (■) severely dropped and infant calprotectin (■) severely increased. Infant 25 also had 12 morbidity instances (■), unlike weeks 4 and 16 in which she experienced zero. Her WAZ score (■) also dropped during these time points.

**Supplementary Table 1.** Major microbial contributors of metabolic functions found to change over the first 20 weeks of life.

| <b>Gene</b>                           | <b>Order</b>    | <b>Family</b>      | <b>Genus</b>    | <b>Proportional contribution in all samples</b> |
|---------------------------------------|-----------------|--------------------|-----------------|-------------------------------------------------|
| Hexokinase                            | Bacteroidales   | Bacteroidaceae     | Bacteroides     | 0.286                                           |
| Hexokinase                            | Clostridiales   | Veillonellaceae    | Megasphaera     | 0.418                                           |
| Hexokinase                            | Bacteroidales   | Porphyromonadaceae | Parabacteroides | 0.293                                           |
| Butyrate-acetoacetate CoA-transferase | Clostridiales   | Veillonellaceae    | Megasphaera     | 0.953                                           |
| Butyrate-acetoacetate CoA-transferase | Fusobacteriales | Fusobacteriaceae   | Fusobacterium   | 0.0339                                          |
| Butyrate-acetoacetate CoA-transferase | Clostridiales   | Lachnospiraceae    | All             | 0.0136                                          |
| Glutaconyl-CoA decarboxylase          | Clostridiales   | Veillonellaceae    | All             | 0.932                                           |
| Glutaconyl-CoA decarboxylase          | Clostridiales   | Lachnospiraceae    | All             | 0.0336                                          |
| Glutaconyl-CoA decarboxylase          | Clostridiales   | Clostridiaceae     | All             | 0.0161                                          |

**Supplementary Table 2.** Morbidity instances used to assign infants to “sick” or “not sick” categories.

| Sample | Number of Morbidity Instances |         |         | Sick or Not Sick |          |          |
|--------|-------------------------------|---------|---------|------------------|----------|----------|
|        | Week 4                        | Week 16 | Week 20 | Week 4           | Week 16  | Week 20  |
| 1      | 0                             | 13      | 0       | Not Sick         | Sick     | Not Sick |
| 2      | 7                             | 1       | 0       | Sick             | Sick     | Not Sick |
| 3      | 15                            | 2       | 0       | Sick             | Sick     | Not Sick |
| 4      | 5                             | 0       | 0       | Sick             | Not Sick | Not Sick |
| 5      | 0                             | 0       | 11      | Not Sick         | Not Sick | Sick     |
| 6      | 28                            | 0       | 0       | Sick             | Not Sick | Not Sick |
| 7      | 9                             | 7       | 24      | Sick             | Sick     | Sick     |
| 8      | 0                             | 1       | 0       | Not Sick         | Sick     | Not Sick |
| 9      | 0                             | 13      | 9       | Not Sick         | Sick     | Sick     |
| 10     | 5                             | 0       | 0       | Sick             | Not Sick | Not Sick |
| 11     | 0                             | 0       | 0       | Not Sick         | Not Sick | Not Sick |
| 12     | 0                             | 3       | 5       | Not Sick         | Sick     | Sick     |
| 13     | 0                             | 9       | 0       | Not Sick         | Sick     | Not Sick |
| 14     | 0                             | 0       | 0       | Not Sick         | Not Sick | Not Sick |
| 15     | 8                             | 0       | 5       | Sick             | Not Sick | Sick     |
| 16     | 4                             | 0       | 5       | Sick             | Not Sick | Sick     |
| 17     | 8                             | 5       | 8       | Sick             | Sick     | Sick     |
| 18     | 4                             | 4       | 15      | Sick             | Sick     | Sick     |
| 19     | 0                             | 0       | 0       | Not Sick         | Not Sick | Not Sick |
| 20     | 10                            | 0       | 7       | Sick             | Not Sick | Sick     |
| 21     | 0                             | 0       | 0       | Not Sick         | Not Sick | Not Sick |
| 22     | 0                             | 9       | 19      | Not Sick         | Sick     | Sick     |
| 23     | 0                             | 18      | 11      | Not Sick         | Sick     | Sick     |
| 24     | 0                             | 9       | 0       | Not Sick         | Sick     | Not Sick |
| 25     | 0                             | 0       | 12      | Not Sick         | Not Sick | Sick     |
| 26     | 0                             | 0       | 3       | Not Sick         | Not Sick | Sick     |
| 27     | 4                             | 0       | 0       | Sick             | Not Sick | Not Sick |
| 28     | 0                             | 0       | 9       | Not Sick         | Not Sick | Sick     |
| 29     | 0                             | 7       | 0       | Not Sick         | Sick     | Not Sick |
| 30     | 0                             | 5       | 6       | Not Sick         | Sick     | Sick     |
| 31     | 0                             | 4       | 0       | Not Sick         | Sick     | Not Sick |
| 32     | 0                             | 0       | 0       | Not Sick         | Not Sick | Not Sick |
| 33     | 0                             | 0       | 0       | Not Sick         | Not Sick | Not Sick |

**Supplementary Table 3.** Weight-for-age (WAZ) and height-for-age (HAZ) Z scores calculated for each infant against a Gambian reference.

| Sample | WAZ score |         |         | HAZ score |         |         |
|--------|-----------|---------|---------|-----------|---------|---------|
|        | Week 4    | Week 16 | Week 20 | Week 4    | Week 16 | Week 20 |
| 1      | 0.167     | -1.18   | -1.18   | 0.909     | -0.322  | -1.77   |
| 2      | -1.85     | 0.338   | 0.913   | 0.728     | -3.76   | 0.736   |
| 3      | -0.341    | -0.0796 | -0.146  | 0.292     | 0.157   | -0.575  |
| 4      | -1.67     | 0.926   | 0.863   | -0.613    | 0.367   | 0.639   |
| 5      | 0.587     | 2.78    | 2.75    | 1.12      | -1.54   | 1.58    |
| 6      | -1.61     | 1.28    | 0.875   | 0.536     | 2.04    | 0.736   |
| 7      | 0.0952    | 0.625   | 0.202   | -0.133    | 0.591   | 0.487   |
| 8      | 0.389     | 0.318   | 0.281   | 1.12      | 0.243   | 1.45    |
| 9      | -1.72     | -0.0539 | -0.1    | -0.153    | -0.898  | -1.19   |
| 10     | -1.9      | 0.0294  | 0.1     | 0.69      | 0.735   | 0.351   |
| 11     | -1.75     | 0.25    | 0.129   | 0.728     | 0.816   | 0.527   |
| 12     | 0.143     | 0.284   | 0.101   | 0.21      | 0.157   | 0.398   |
| 13     | 1.32      | 1.55    | 1.31    | 1.73      | 1.24    | 1.46    |
| 14     | -2.38     | -0.662  | -0.65   | 0.345     | 0.531   | 1.65    |
| 15     | 0.452     | 1.09    | 1.29    | 0.58      | 0.388   | 0.929   |
| 16     | 0.706     | 1.51    | 2.09    | 0.704     | 1.46    | 1.37    |
| 17     | 0.296     | -1.57   | -0.35   | 1.53      | 0.816   | 0.0625  |
| 18     | -2.58     | 0.706   | -1      | -0.996    | -1.51   | -0.995  |
| 19     | -0.579    | -1.02   | -0.708  | -0.449    | -0.974  | -0.974  |
| 20     | -2.39     | 0.19118 | 0.0625  | 0.345     | 0.816   | 1.41    |
| 21     | -2.15     | -0.926  | -0.617  | 0.345     | -1.1    | -0.354  |
| 22     | -1.54     | 1.43    | 1.5     | 1.8       | 1.14    | 0.351   |
| 23     | 0.23      | 0       | 0.397   | 0.498     | 0.809   | 0.221   |
| 24     | 0.238     | -0.739  | -0.124  | 0.704     | 0.722   | 0.487   |
| 25     | -1.48     | -0.0882 | -0.35   | 0.536     | 0.939   | 1.31    |
| 26     | -0.286    | -0.432  | -0.303  | 0.498     | 0.2     | -0.398  |
| 27     | -2.77     | -1.41   | -1.05   | -2.15     | -1.92   | -2.82   |
| 28     | -2.66     | -0.99   | -0.85   |           | -0.286  | -0.995  |
| 29     | -1.79     | -1.63   | -1.41   |           | -0.408  | -0.611  |
| 30     | -0.317    | 0.837   | 0.652   | -0.901    | -0.409  | -0.664  |
| 31     | 0.341     | 0.409   | 0.27    | -0.531    | 0.678   | -0.693  |
| 32     | 0.516     | 0.443   | 0.506   | 1.16      | 1.2     | 0.531   |
| 33     | -0.381    | -1.25   | -0.727  | -1.77     | -2.67   | -2.45   |

**Supplementary Table 4.** Maternal age and weight, and infant sex, weight, and height.

| Sample | Maternal Age (years) | Maternal Weight (kg) | Infant Sex | Infant Weight (kg) |         |         | Infant Height (cm) |         |         |
|--------|----------------------|----------------------|------------|--------------------|---------|---------|--------------------|---------|---------|
|        |                      | Week 1               |            | Week 4             | Week 16 | Week 20 | Week 4             | Week 16 | Week 20 |
| 1      | 42                   | 54.37                | M          | 4.61               | 5.66    | 5.8     | 56.5               | 62.9    | 60.9    |
| 2      | 22                   | 73.6                 | F          | 4.25               | 6.36    | 7.03    | 55.5               | 53      | 64.8    |
| 3      | 21                   | 51.27                | M          | 3.97               | 6.63    | 6.72    | 55                 | 64      | 63.6    |
| 4      | 23                   | 47.6                 | F          | 4.43               | 6.76    | 6.99    | 52                 | 63.1    | 64.6    |
| 5      | 34                   | 57.07                | M          | 5.14               | 9.15    | 9.29    | 57                 | 60.1    | 68.47   |
| 6      | 33                   | 60.9                 | F          | 4.49               | 7       | 7       | 55                 | 67.2    | 64.8    |
| 7      | 27                   | 55.3                 | M          | 4.52               | 7.25    | 7.03    | 53.97              | 65      | 66      |
| 8      | 37                   | 53.7                 | M          | 4.89               | 6.98    | 7.1     | 57                 | 64.2    | 68.2    |
| 9      | 30                   | 54.83                | F          | 4.38               | 6.09    | 6.22    | 53.2               | 60      | 60.8    |
| 10     | 32                   | 66.33                | F          | 4.2                | 6.15    | 6.38    | 55.4               | 64      | 64      |
| 11     | 33                   | 58.83                | F          | 4.35               | 6.3     | 6.4     | 55.5               | 64.2    | 64.37   |
| 12     | 23                   | 57                   | M          | 4.58               | 6.95    | 6.94    | 54.8               | 64      | 65.8    |
| 13     | 44                   | 61.8                 | M          | 6.06               | 8.06    | 8.02    | 58.5               | 66.5    | 68.2    |
| 14     | 40                   | 58.77                | F          | 3.72               | 5.68    | 5.78    | 54.5               | 63.5    | 66.7    |
| 15     | 24                   | 60.4                 | M          | 4.97               | 7.66    | 8       | 55.7               | 64.53   | 67      |
| 16     | 21                   | 50.83                | M          | 5.29               | 8.03    | 8.71    | 56                 | 67      | 68      |
| 17     | 28                   | 58.33                | F          | 6.4                | 5.06    | 6.02    | 57.6               | 64.2    | 63.4    |
| 18     | 22                   | 56.37                | F          | 3.52               | 6.61    | 5.5     | 51                 | 58.5    | 61.2    |
| 19     | 29                   | 60.7                 | M          | 3.67               | 5.8     | 6.22    | 53.2               | 61.4    | 62.7    |
| 20     | 28                   | 86.73                | F          | 3.71               | 6.26    | 6.35    | 54.5               | 64.2    | 66.2    |
| 21     | 43                   | 57.4                 | F          | 3.95               | 5.5     | 5.81    | 54.5               | 59.5    | 62.53   |
| 22     | 31                   | 55.8                 | F          | 4.56               | 7.1     | 7.5     | 58.3               | 65      | 64      |
| 23     | 25                   | 53.9                 | M          | 4.69               | 6.7     | 7.2     | 55.5               | 65.5    | 65.4    |
| 24     | 43                   | 61.9                 | M          | 4.7                | 6.05    | 6.74    | 56                 | 65.3    | 66      |
| 25     | 37                   | 59.57                | F          | 4.62               | 6.07    | 6.02    | 55                 | 64.5    | 66      |
| 26     | 28                   | 56.77                | M          | 4.04               | 6.32    | 6.58    | 55.5               | 64.1    | 64      |
| 27     | 30                   | 48.9                 | F          | 3.33               | 5.17    | 5.46    | 48                 | 57.5    | 57.4    |
| 28     | 24                   | 48.77                | F          | 3.44               |         | 5.62    | 51                 | 61.5    | 61.2    |
| 29     | 34                   | 59.8                 | F          | 4.31               |         | 5.17    | 59                 | 61.2    | 62      |
| 30     | 19                   | 62.27                | M          | 4                  | 7.44    | 7.43    | 52.1               | 62.7    | 63.4    |
| 31     | 24                   | 53.6                 | M          | 4.83               | 7.06    | 7.09    | 53                 | 65.2    | 63.33   |
| 32     | 21                   | 54.3                 | M          | 5.05               | 7.09    | 7.3     | 57.1               | 66.4    | 66.1    |
| 33     | 45                   | 60.63                | M          | 3.92               | 5.6     | 6.2     | 50                 | 57.5    | 59.37   |

**Supplementary Figure S1.** Differences in individual human milk oligosaccharide (HMO) structures between “sick” and “not sick” infants.

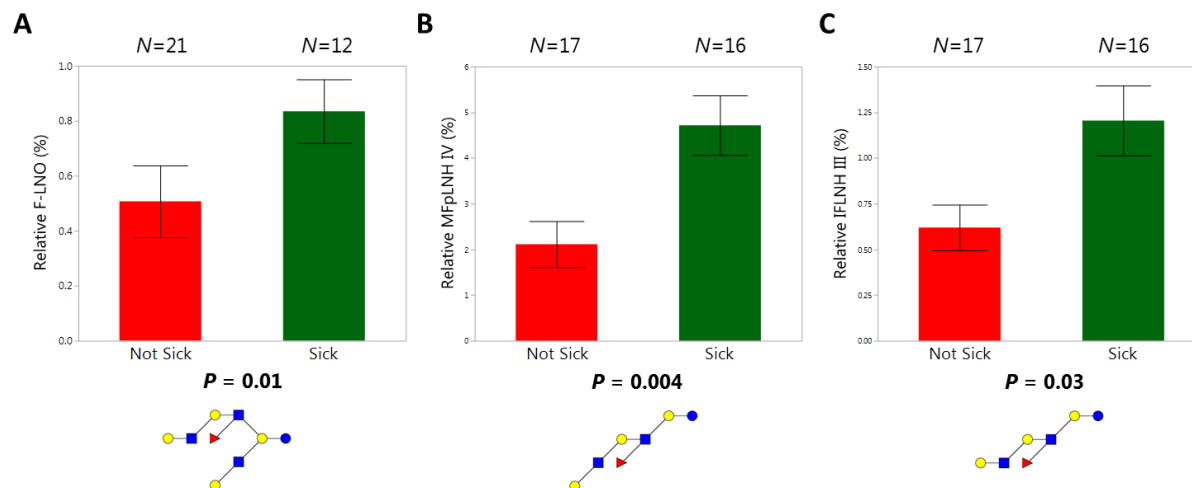

**Supplementary Figure S2.** Relative abundance plots of enriched taxa of infants who were classified as “sick” or “not sick.”

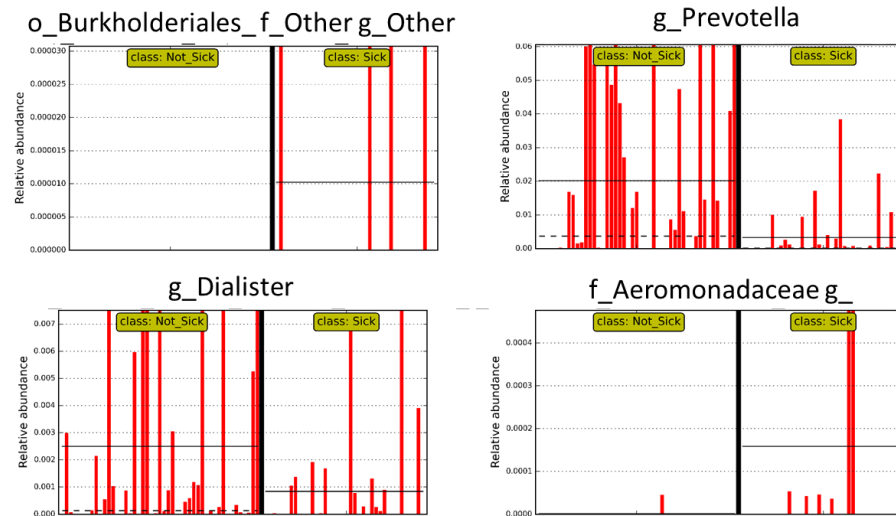

**Supplementary Figure S3.** Infant fecal calprotectin levels by week.

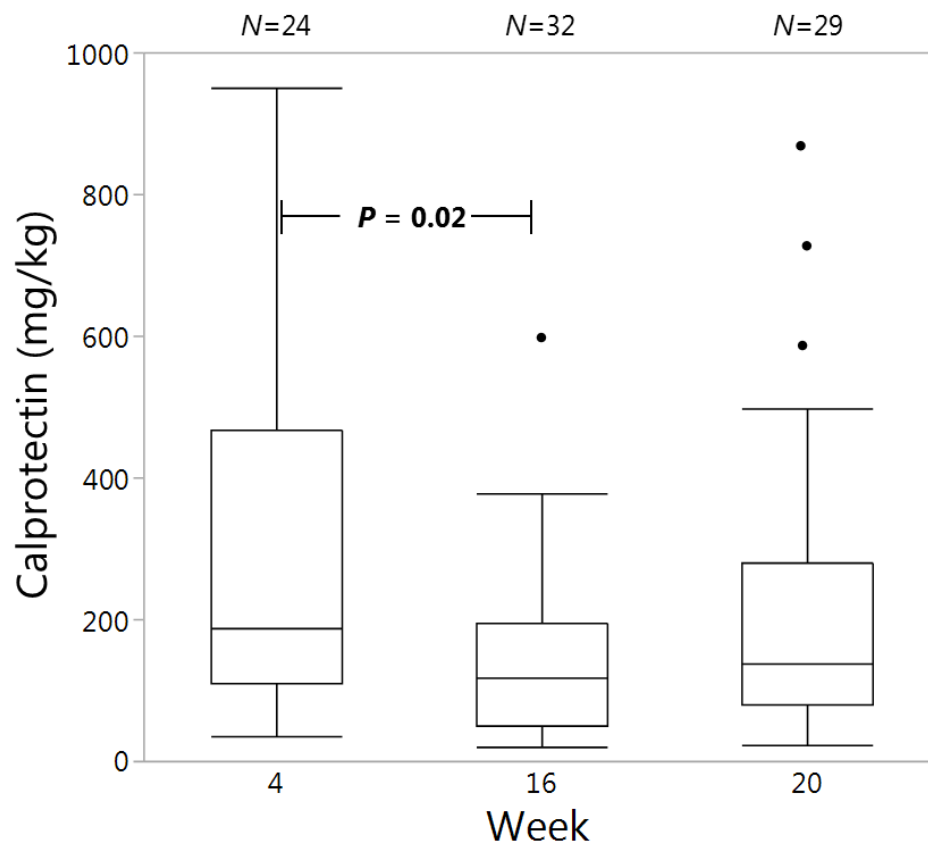

**Supplementary Figure S4.** Relative abundance plots of enriched taxa of infants with normal, borderline, and abnormal calprotectin levels.

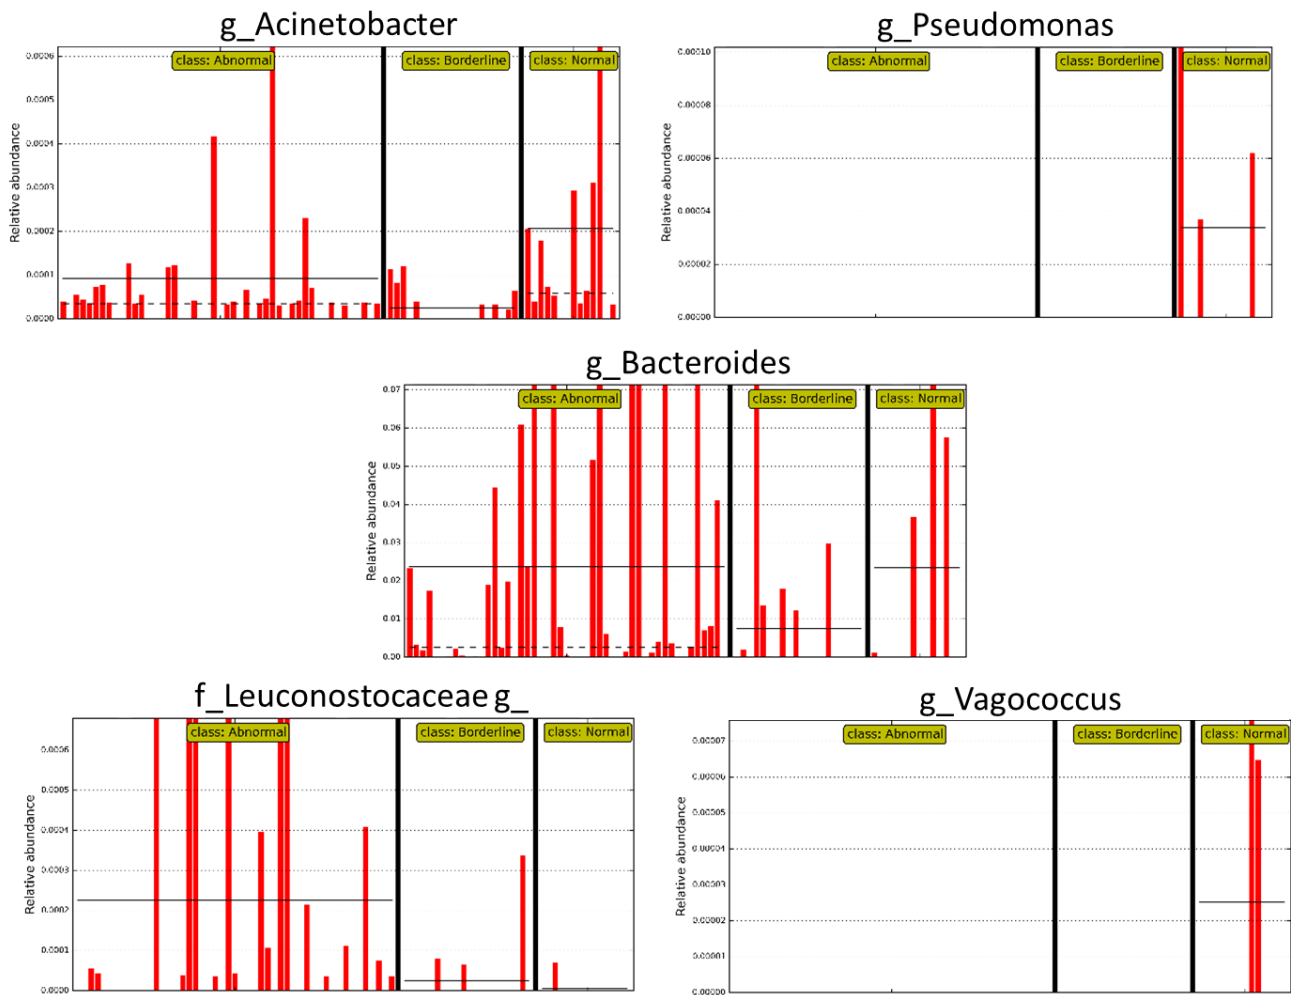

**Supplementary Figure S5.** Cladograms of microbiota enriched in infants separated by growth outcomes.

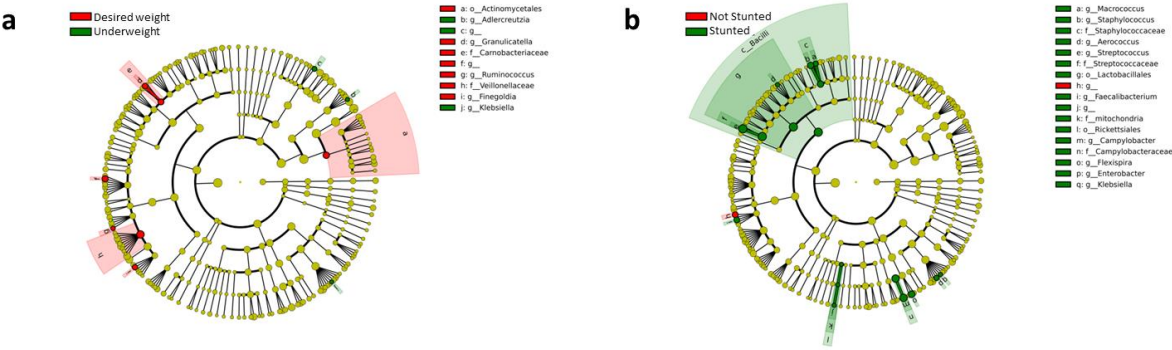

**Supplementary Figure S6.** Cladograms of microbiota enriched in infants based on birth season.

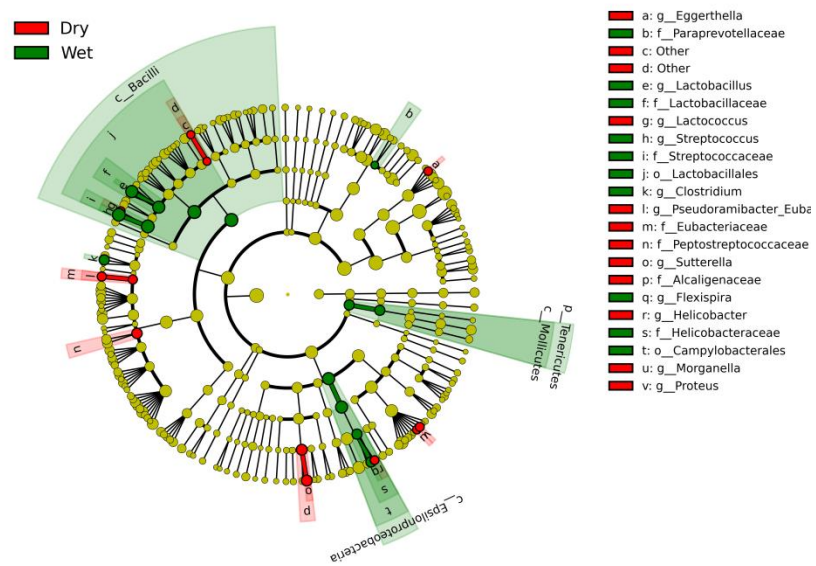

**Supplementary Figure S7.** Changes in predicted functional profiles of microbiota over time.

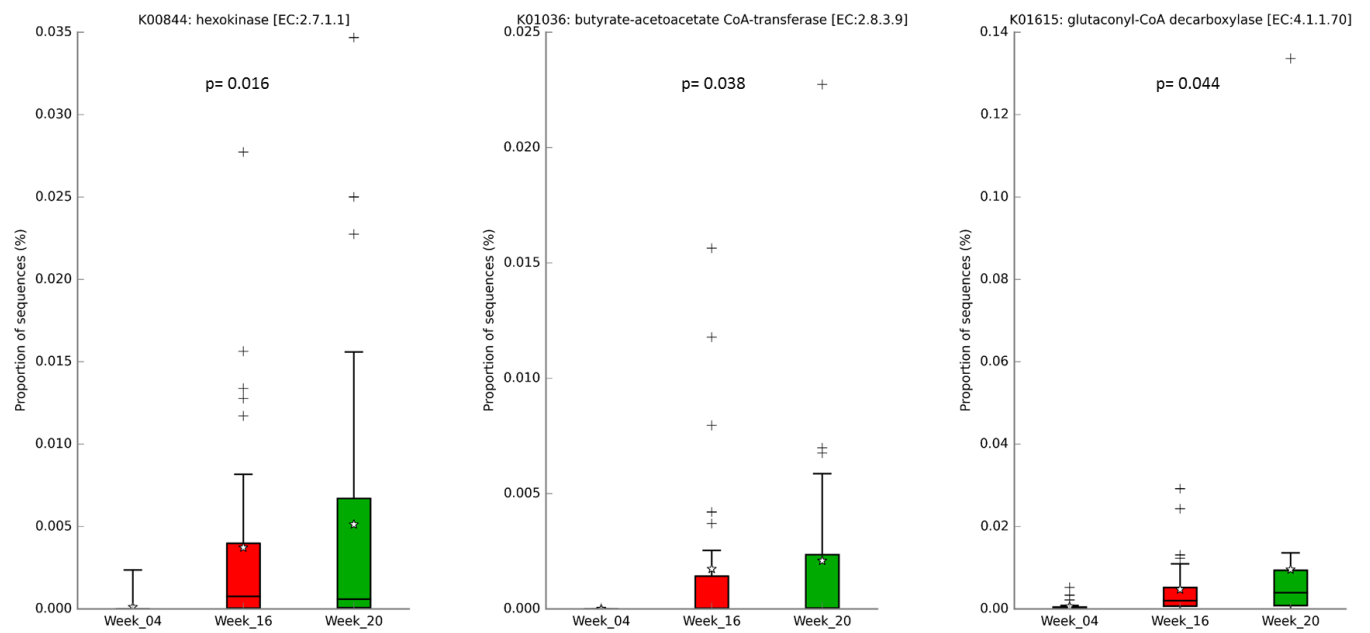

**Supplementary Figure S8.** Associations between growth faltering and increased morbidity with a decrease in abundance of bifidobacteria.

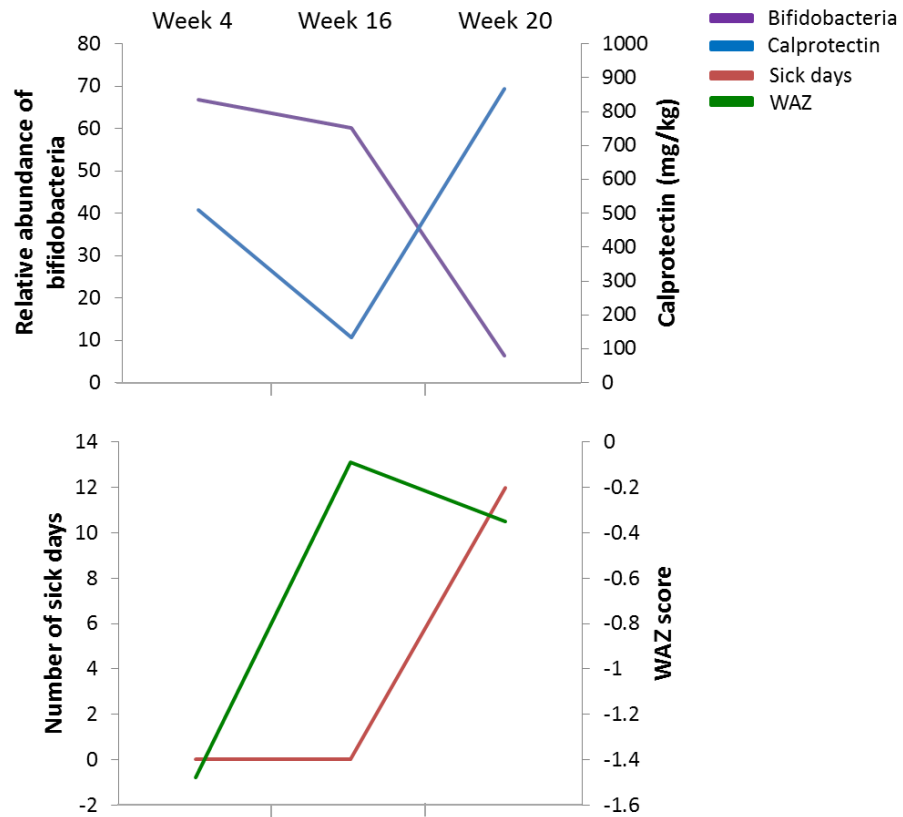

Supplement: Supplementary Materials [file srep40466-s1.pdf]
